# Supplementary material for: Visualizing percolation and ion transport in hybrid solid electrolytes for Li–metal batteries
Source: Royal Society of Chemistry journal article supplement (doi:10.1039/c9ta05118j), 2019-01-01
Supplement: c9ta05118j1.pdf [file c9ta05118j1.pdf]

## Supplementary Information

### Visualizing percolation and ion transport in hybrid solid electrolytes for Li-metal batteries

Wahid Zaman<sup>1</sup>, Nicholas Hortance<sup>2</sup>, Marm B. Dixit<sup>1</sup>, Vincent De Andrade<sup>3</sup>, and Kelsey B. Hatzell<sup>1,2,4\*</sup>

<sup>1</sup>*Department of Mechanical Engineering, Vanderbilt University, Nashville, TN 37240, USA*

<sup>2</sup>*Interdisciplinary Department of Material Science, Vanderbilt University, Nashville, TN 37240, USA*

<sup>3</sup>*Advanced Photon Source, Argonne National Laboratory, Argonne, IL 60439, USA*

<sup>4</sup>*Department of Chemical and Biomolecular Engineering, Vanderbilt University, Nashville, TN 37240, USA*

\**kelsey.b.hatzell@Vanderbilt.edu*

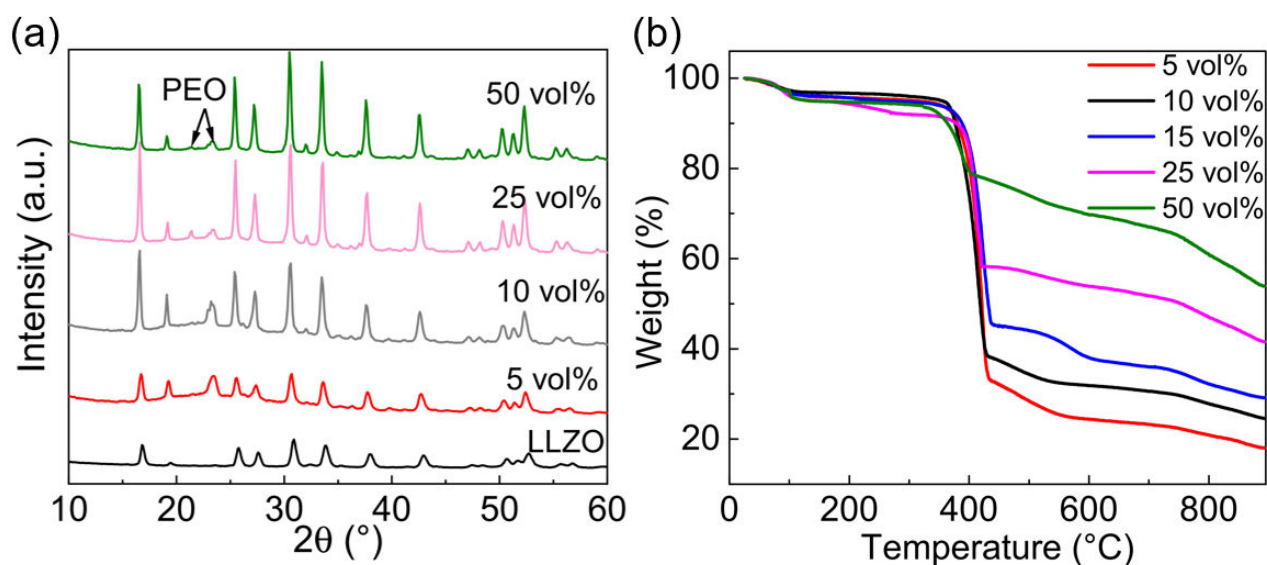

**Figure S 1:** (a) XRD and (b) TGA of PEO-LLZO electrolytes at different loading

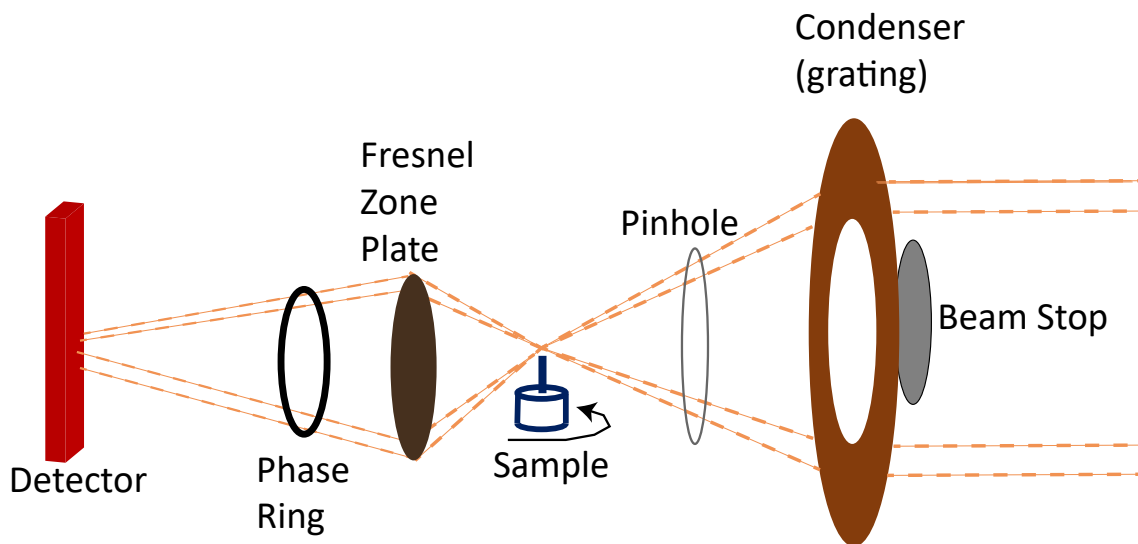

**Figure S 2:** Schematic of synchrotron X-ray nanotomography

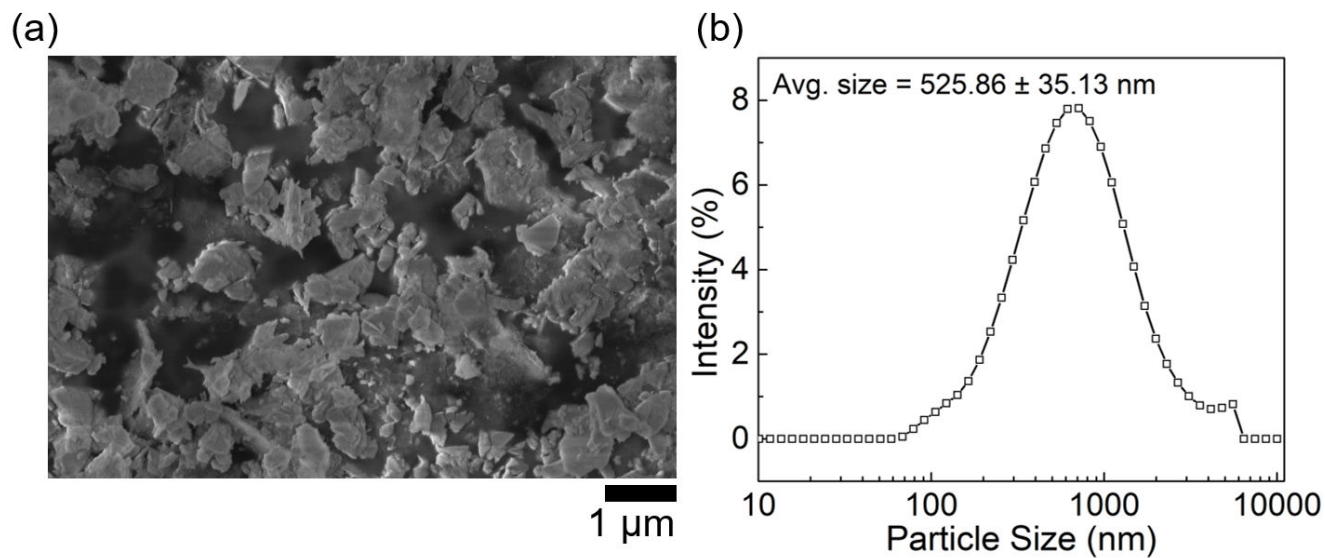

**Figure S 3:** (a) SEM image of Al-LLZO powder and (b) LLZO particle size distribution from dynamic light scattering (DLS)

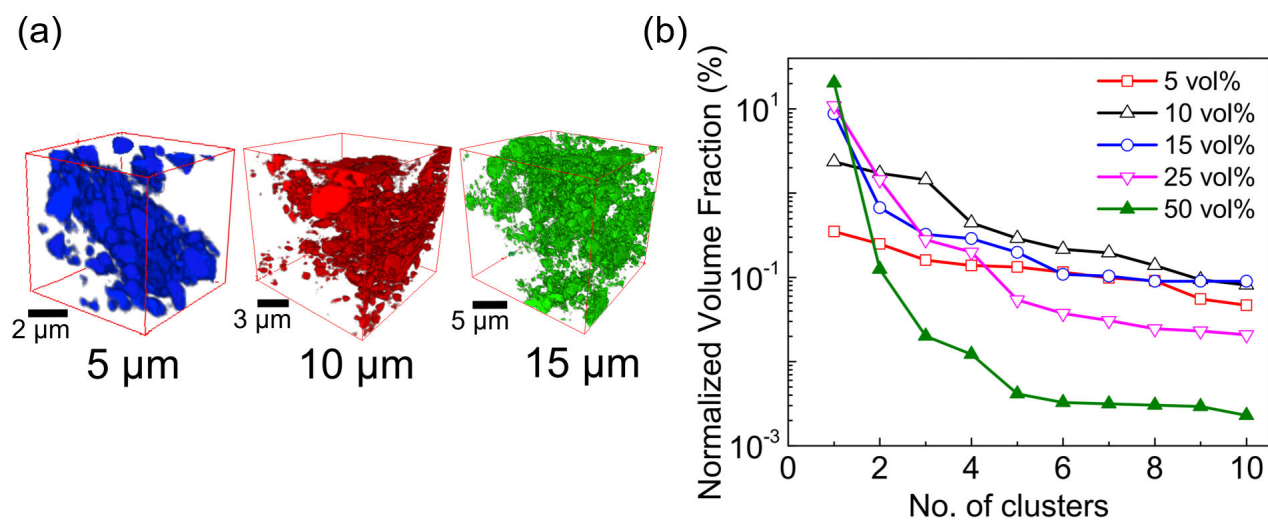

**Figure S 4:** (a) Reconstructed images at 5, 10 and 15  $\mu\text{m}$  sub-volume and (b) normalized area of 10 largest clusters
